# Supplementary material
Source: PubMed Central journal article supplement (PMC1317954)

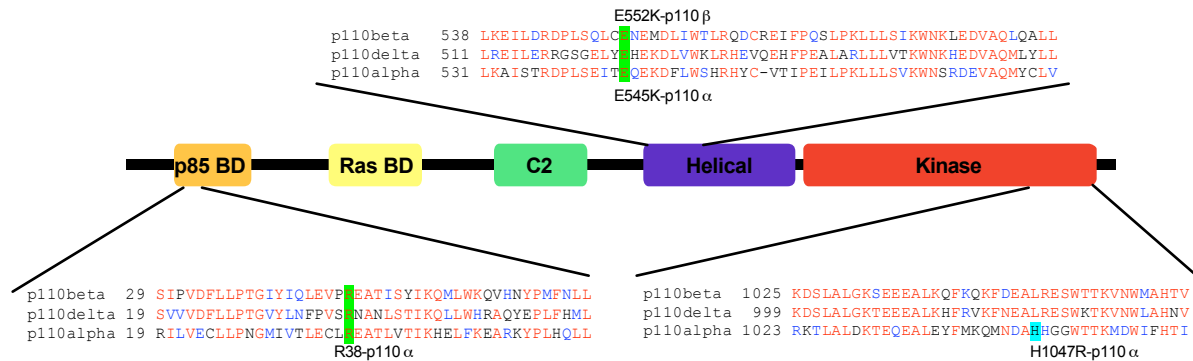

Supplement: pnas_0508988102_1.pdf [file pnas_0508988102_1.pdf]

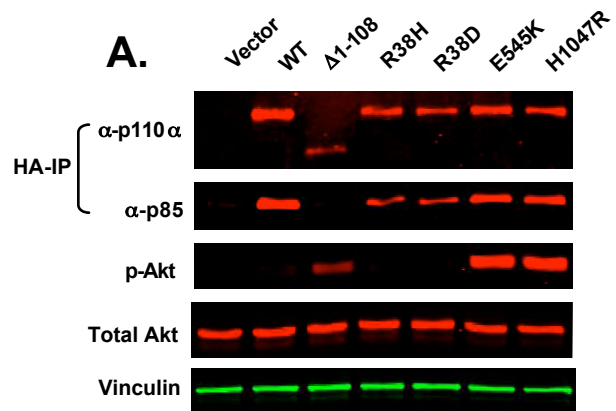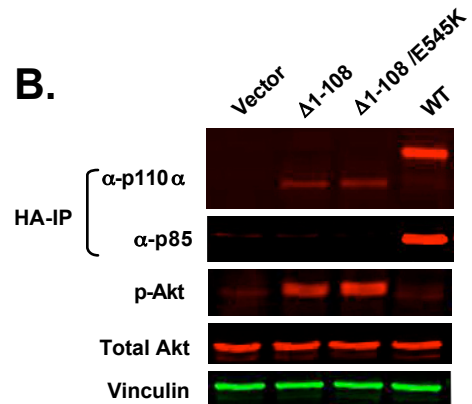

Supplement: pnas_0508988102_2.pdf [file pnas_0508988102_2.pdf]
